# Supplementary material
Source: publisher figshare collection journal article supplement (https://tandf.figshare.com/ndownloader/files/10312260)
Supplement: Supplementary file 1 [file 10312260]

**Supplementary materials**

**Supplementary figure 1**

**a**

**
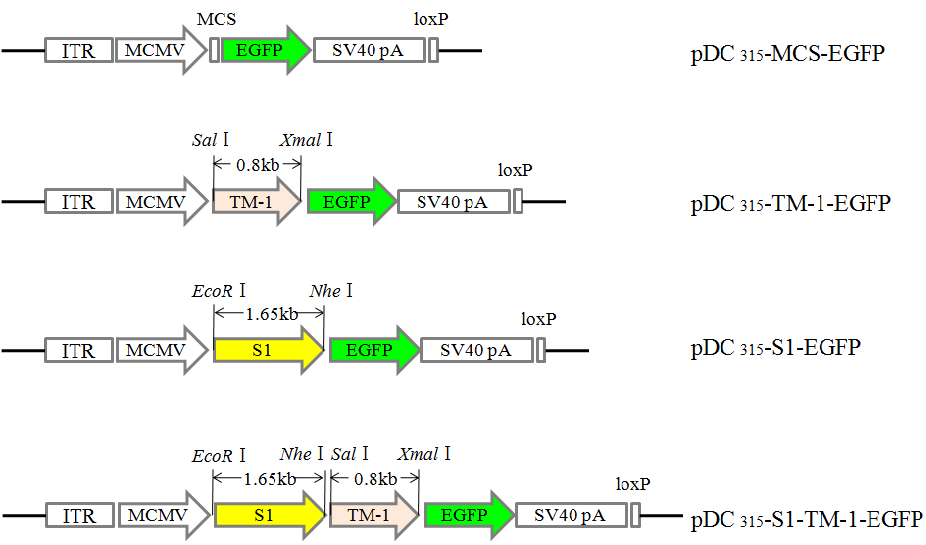
**

**b**

**
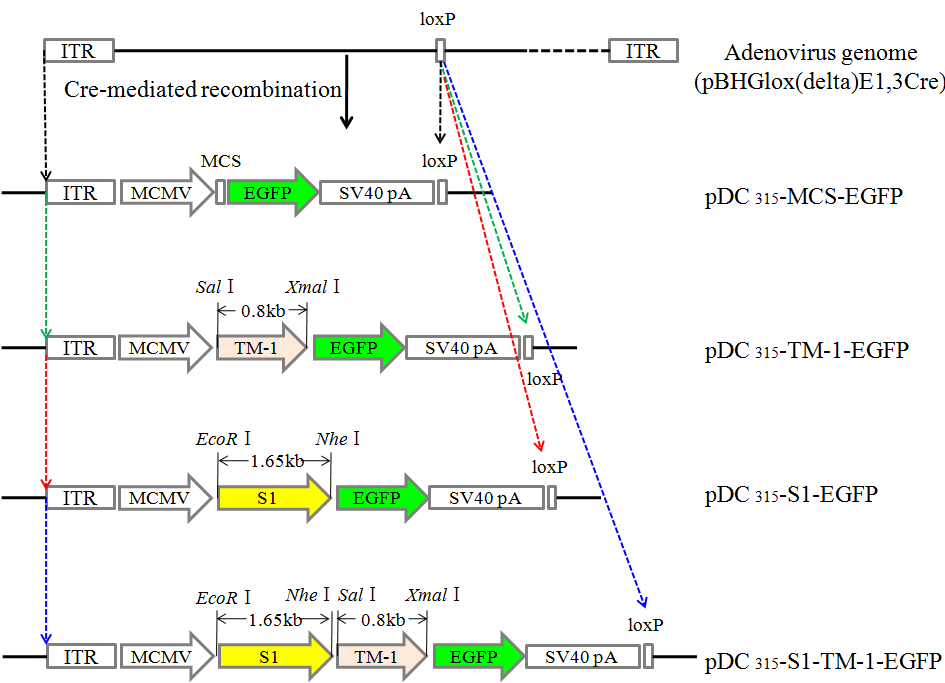
**

**c**

**
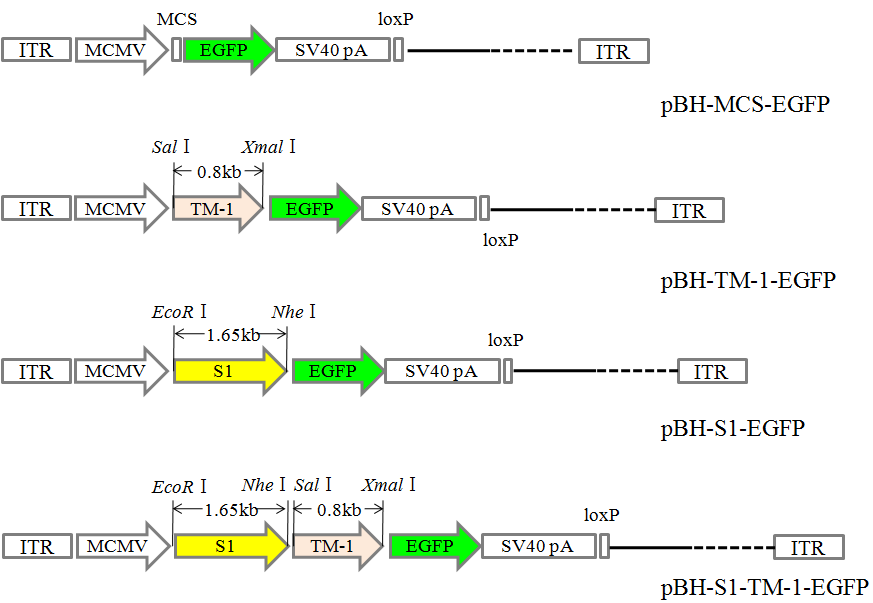
**

**Supplementary figure 2**

**a b**


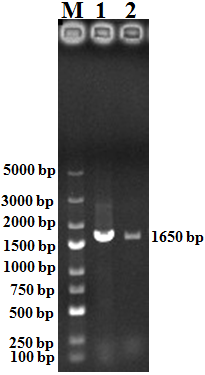

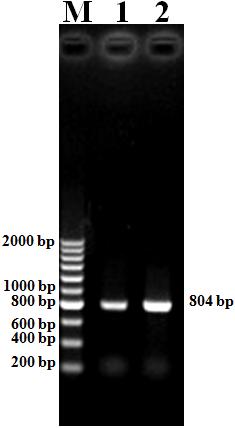


**c d**


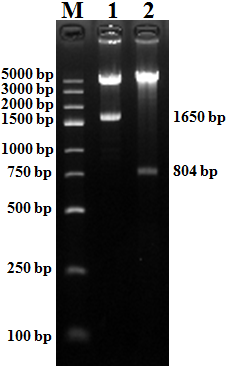

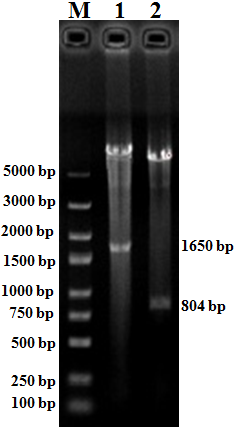


**Supplementary figure 3**

|  | Phase-contrast microscopy | Fluorescence microscopy |
| --- | --- | --- |
| Control | **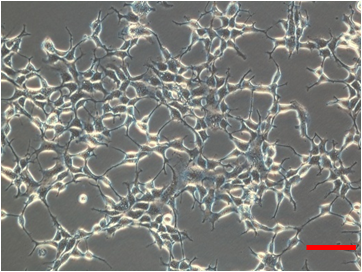**  **100 μm** | **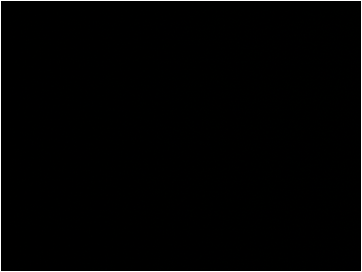** |
| pBH-S1-TM-1-EGFP | **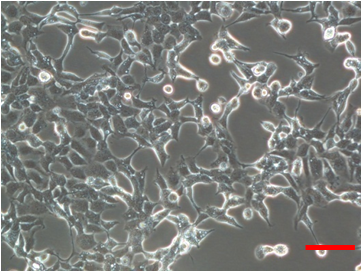** | **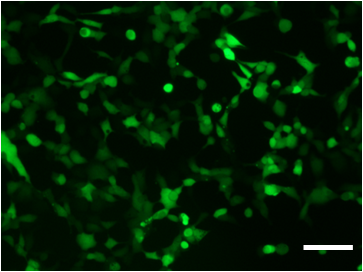** |
| pBH-S1-EGFP | **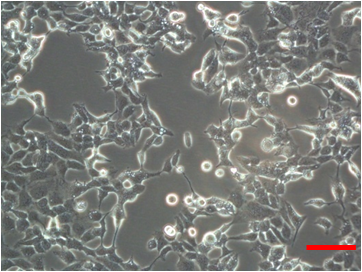** | **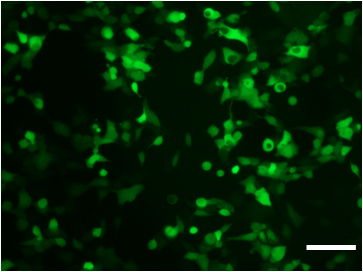** |
| pBH-TM-1-EGFP | **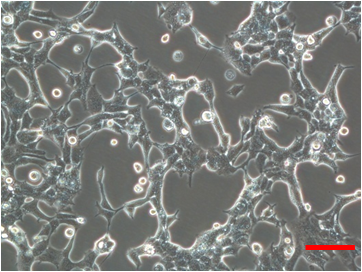** | **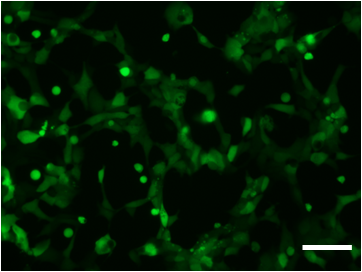** |

**Supplementary figure 4**

**a**

**
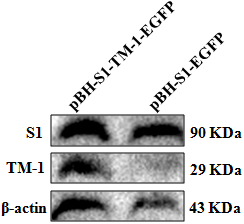
**

**b**

**
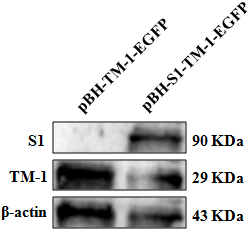
**

**Supplementary figure 5**

**a**

**b c**


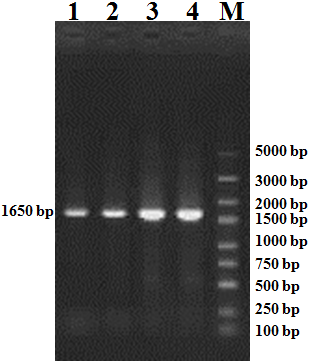

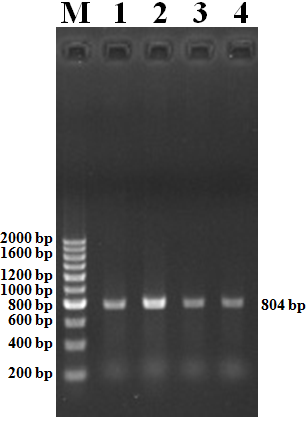


**Supplementary figure 6**

| **a** | Kidney | Lung | Trachea |
| --- | --- | --- | --- |
| IBV group | 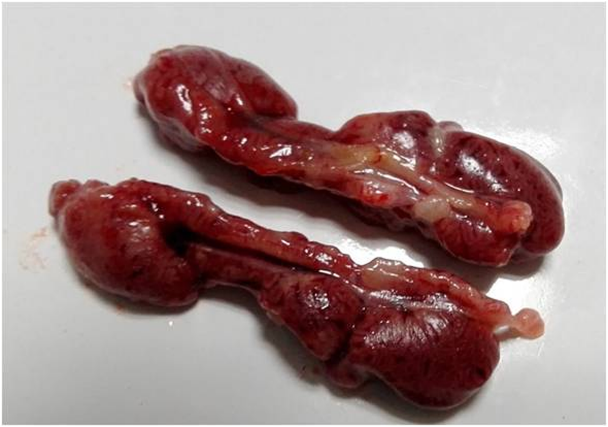 | 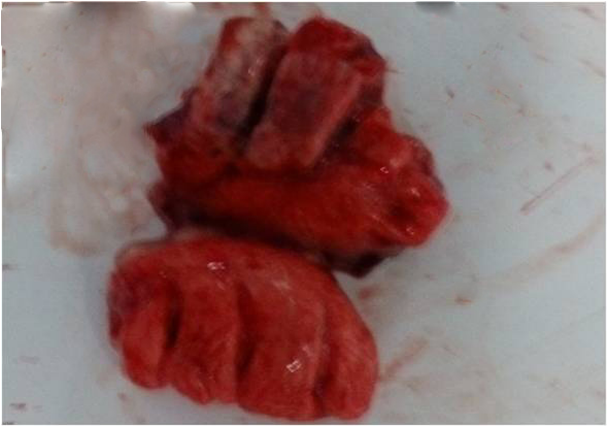 | 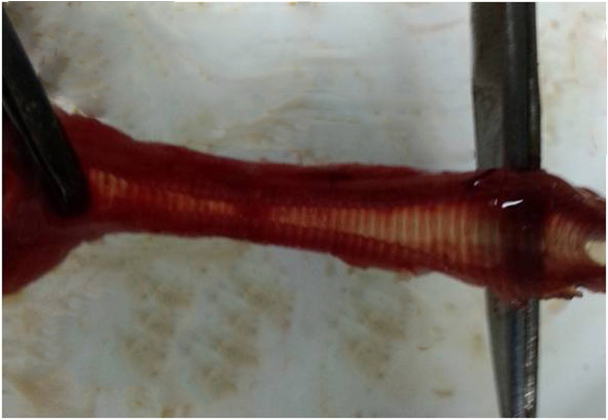 |

| **b** | Air sac | Lung | Trachea |
| --- | --- | --- | --- |
| MG group | 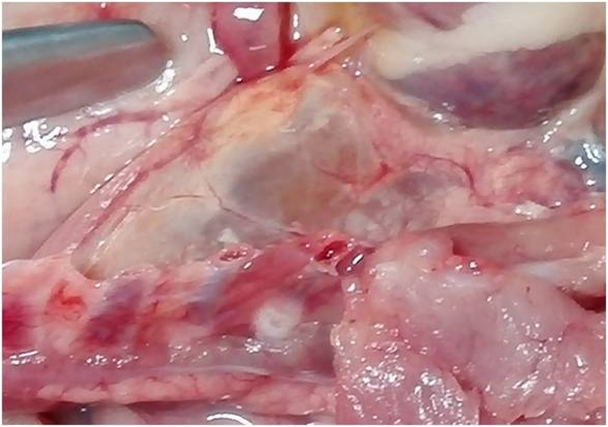 | 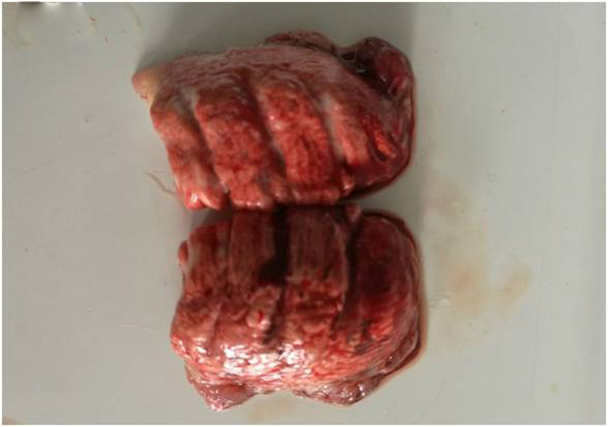 | 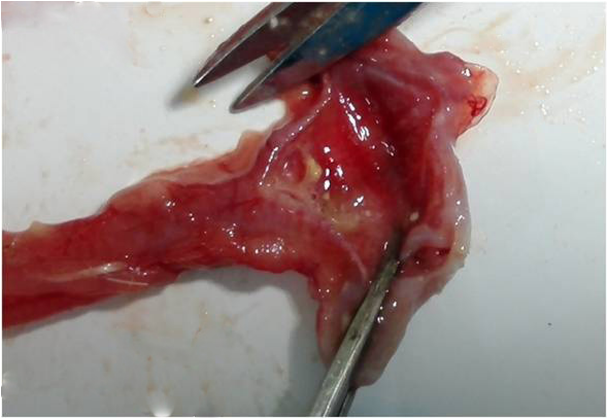 |

**Supplementary figure 7**

|  | Trachea | Lung | Kidney |
| --- | --- | --- | --- |
| Control | **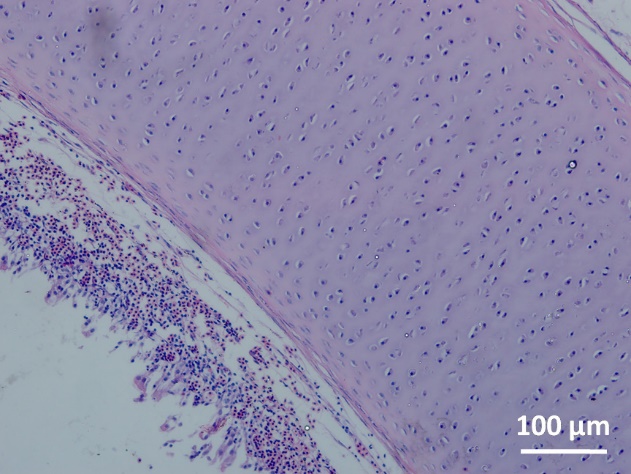**  a | 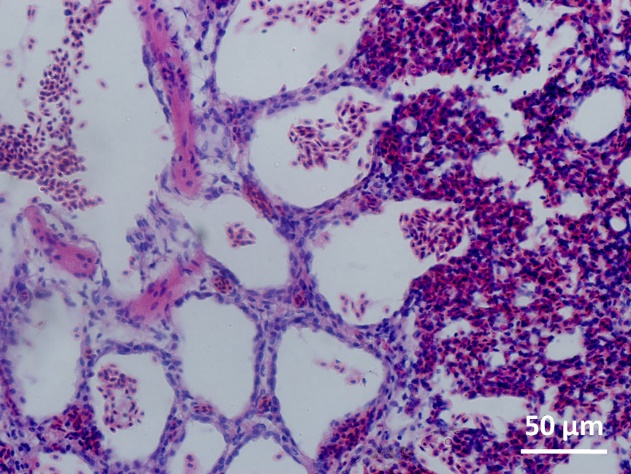  b | 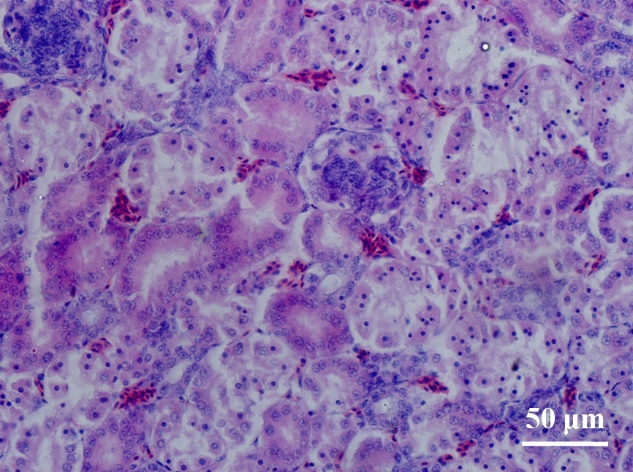  c |
| pBH-EGFP | **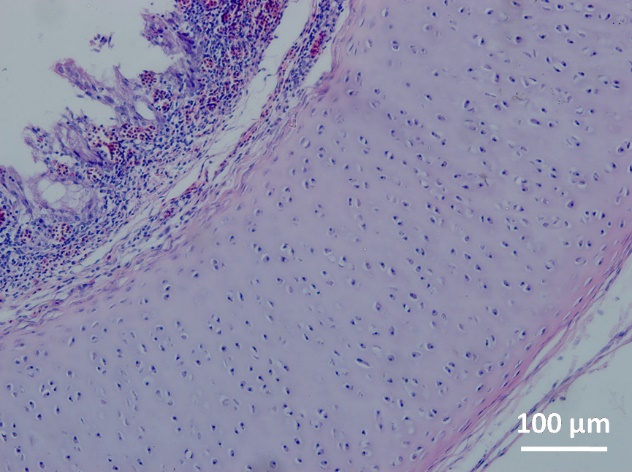**  d | 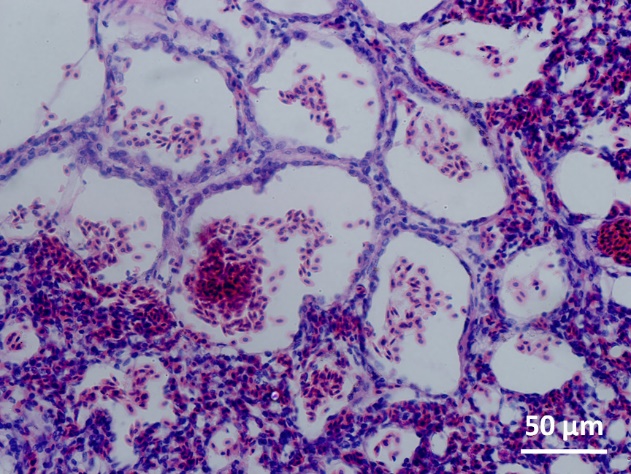  e | 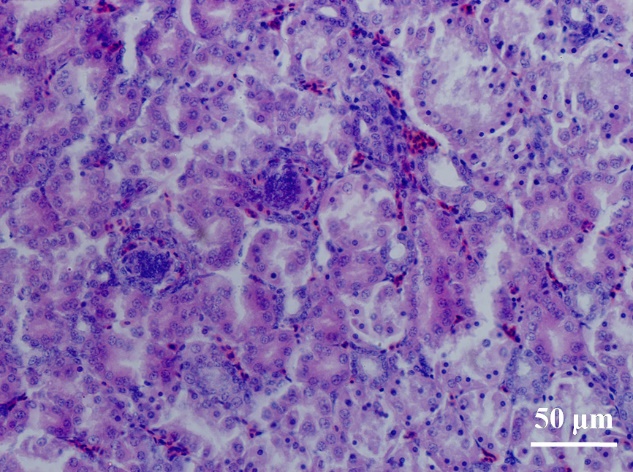  f |
|  | Trachea | Lung | Kidney |
| pBH-S1-EGFP | **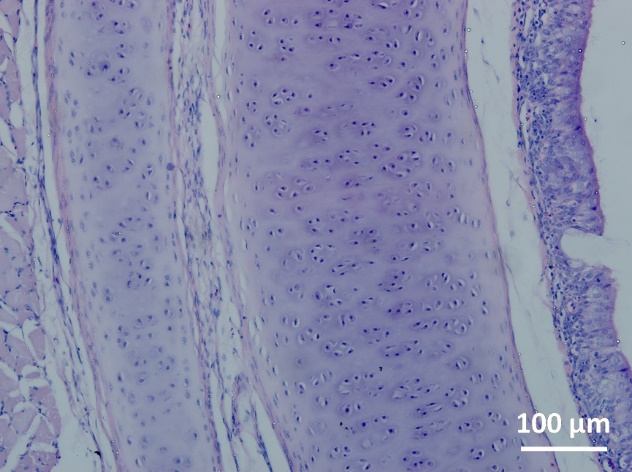**  g | 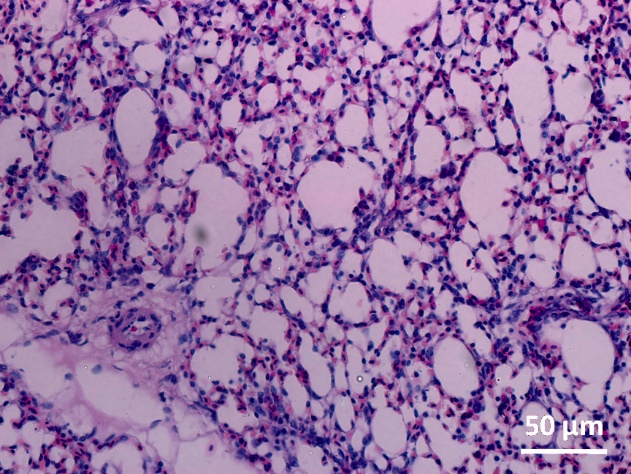  h | 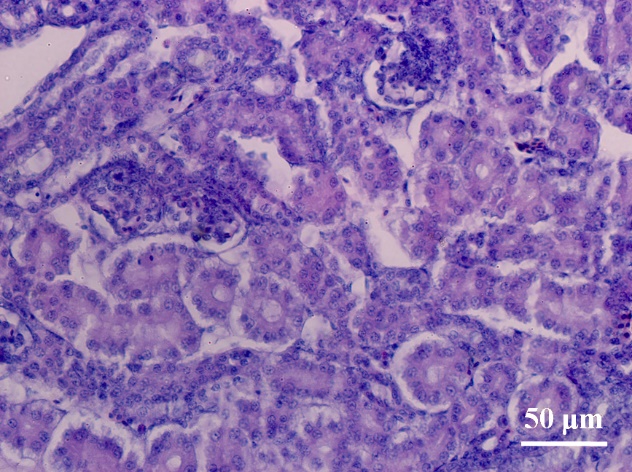  i |
| pBH-S1-TM-1-EGFP | **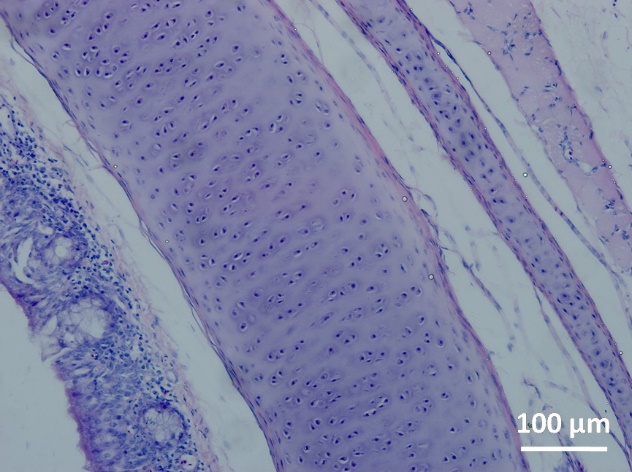**  j | 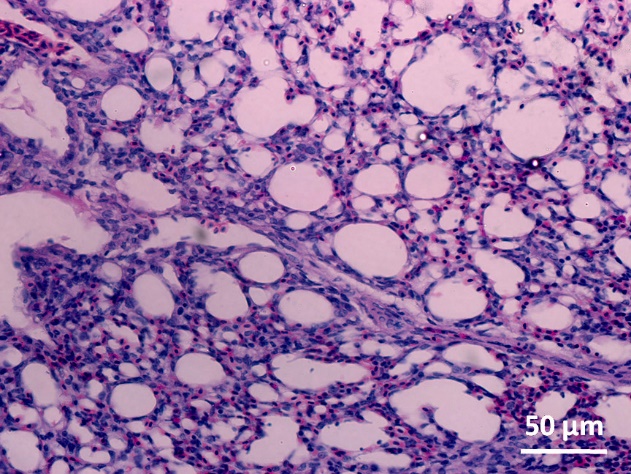  k | 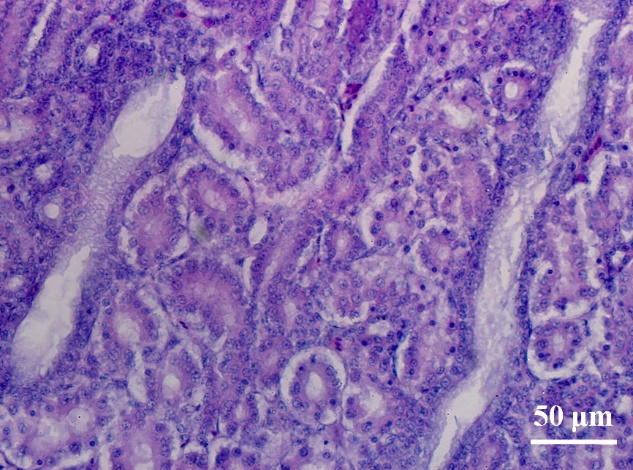  l |

|  | Trachea | Lung | Kidney |
| --- | --- | --- | --- |
| IB attenuated vaccine | **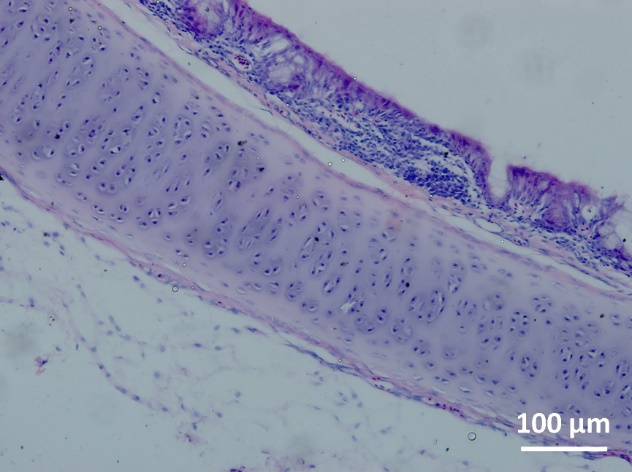**  m | 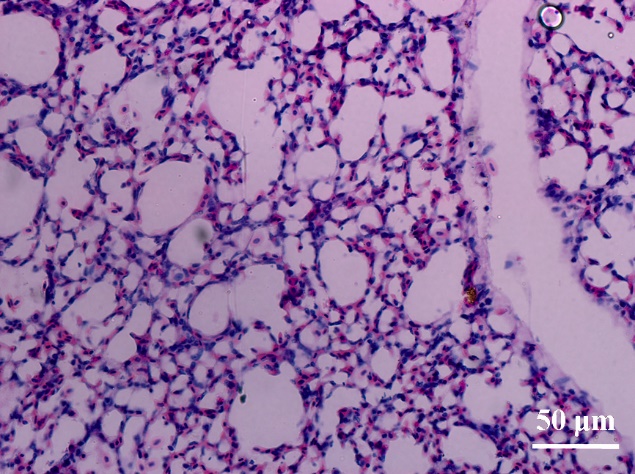  n | 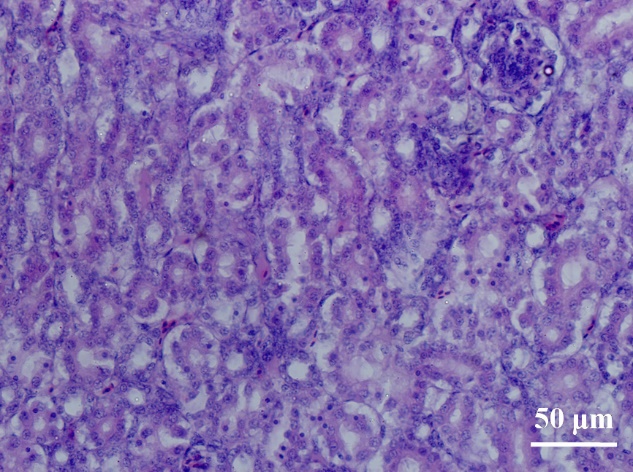  o |

**Supplementary figure 8**


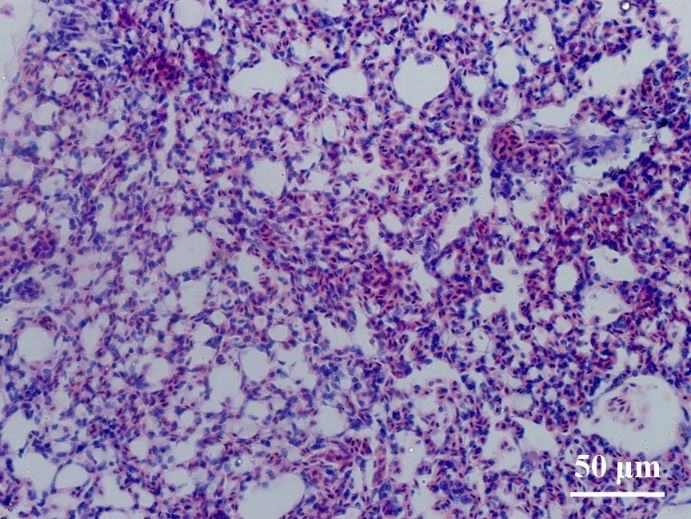

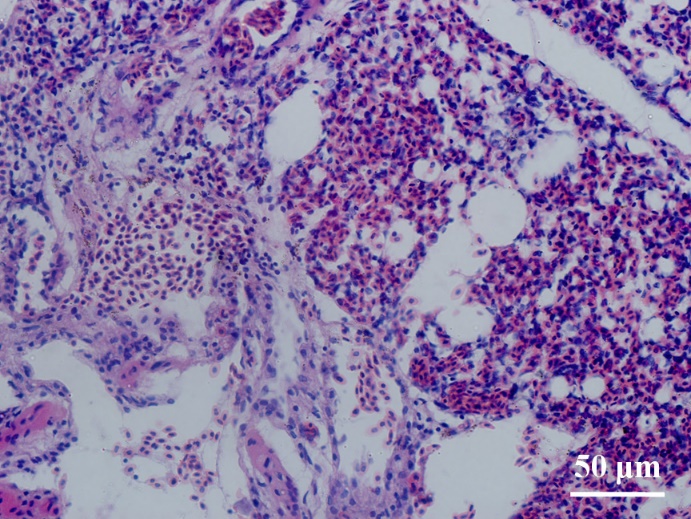


b

a


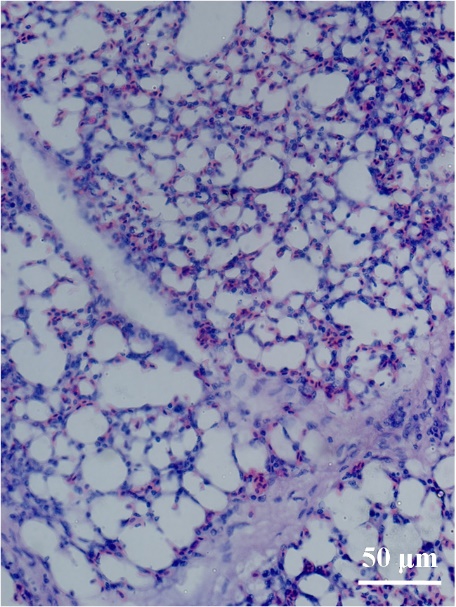

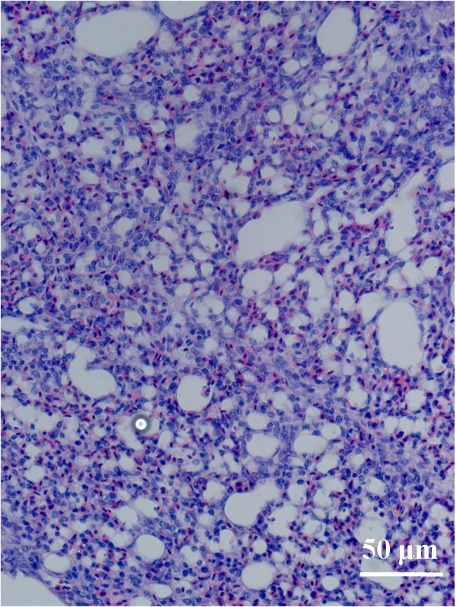


e

c

d
